# Supplementary material for: Anti-inflammatory Lignans from the Fruits of Acanthopanax sessiliflorus
Source: Molecules. 2012 Dec 21;18(1):41–9. doi: 10.3390/molecules18010041 (PMC6270163; doi:10.3390/molecules18010041)

## Supplementary Material

In this “Supplementary Mateiral” file for the manuscript “Anti-Inflammatory Lignans from the Fruits of *Acanthopanax sessiliflorus*”,  $^1\text{H}$ -NMR,  $^{13}\text{C}$ -NMR, and EIMS, HR-EIMS spectra of new compound 1 are available here as listed below.

Contents: Pages S1–S3  $^1\text{H}$  and  $^{13}\text{C}$ -NMR, EIMS, and HR-EIMS of 1.

**Figure S1.**  $^1\text{H}$ -NMR of compound 1.

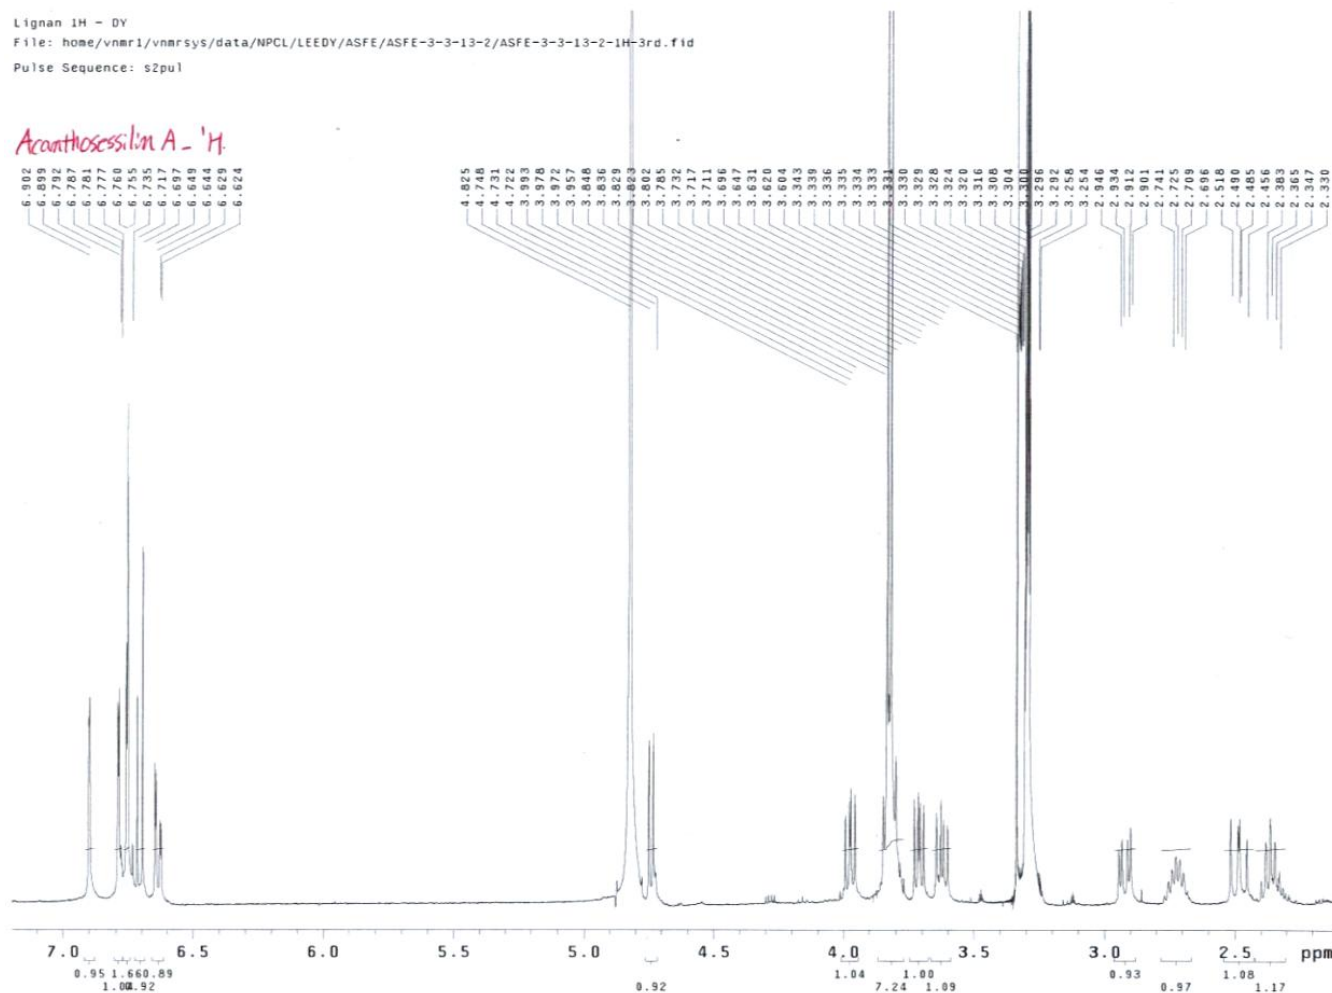

Figure S2.  $^{13}\text{C}$ -NMR of compound 1.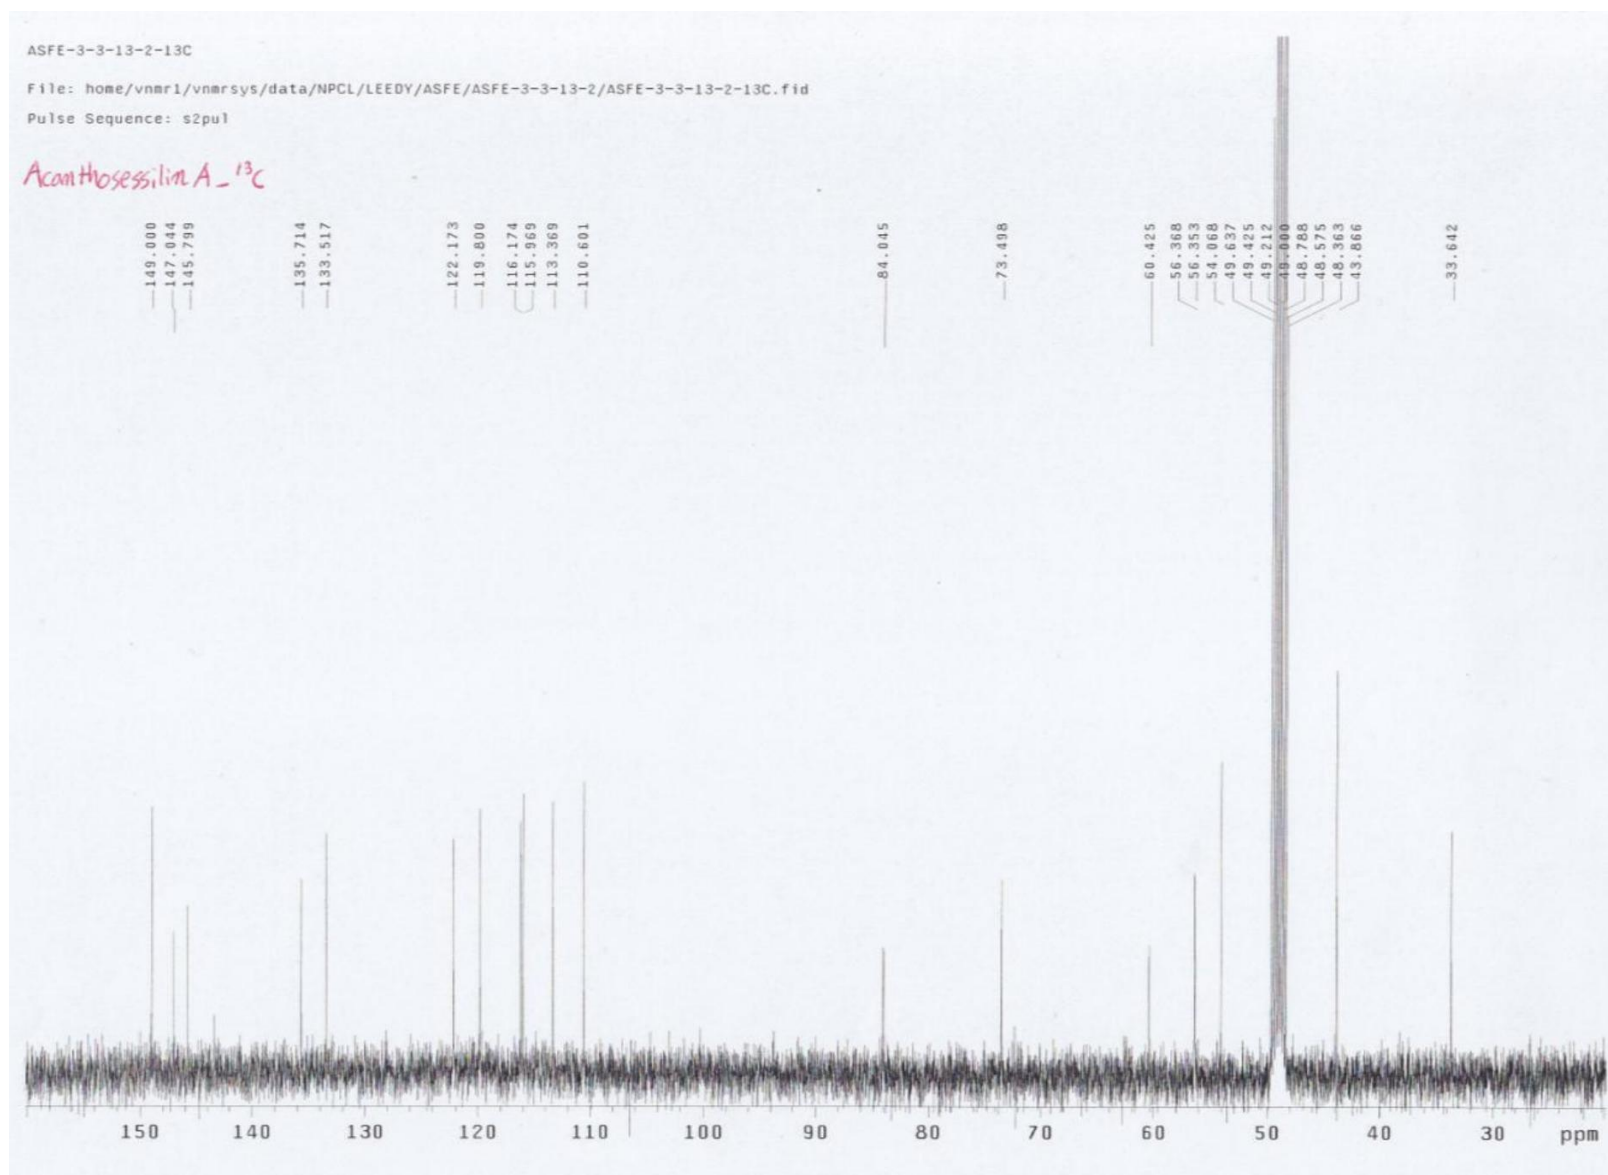

Figure S3. EIMS of compound 1.

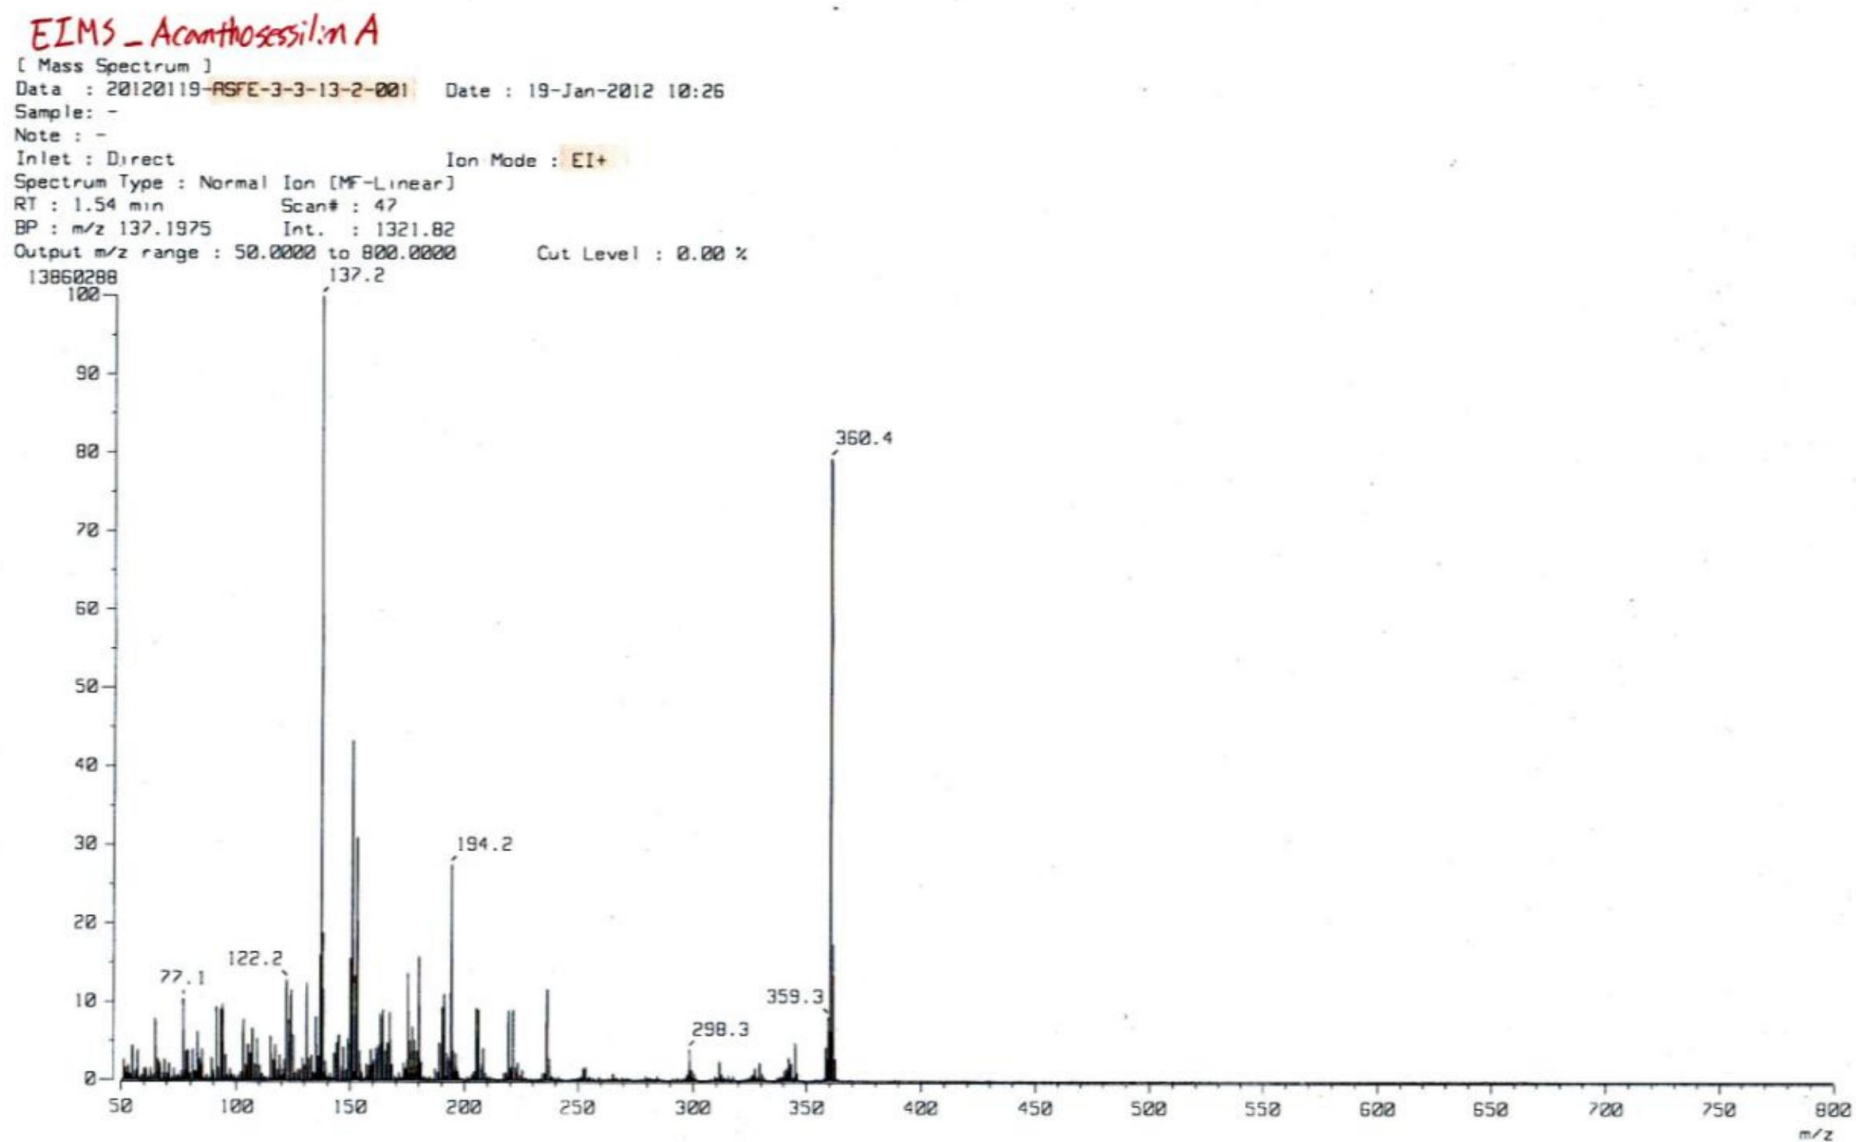

Figure S4. HR-EIMS of compound 1.

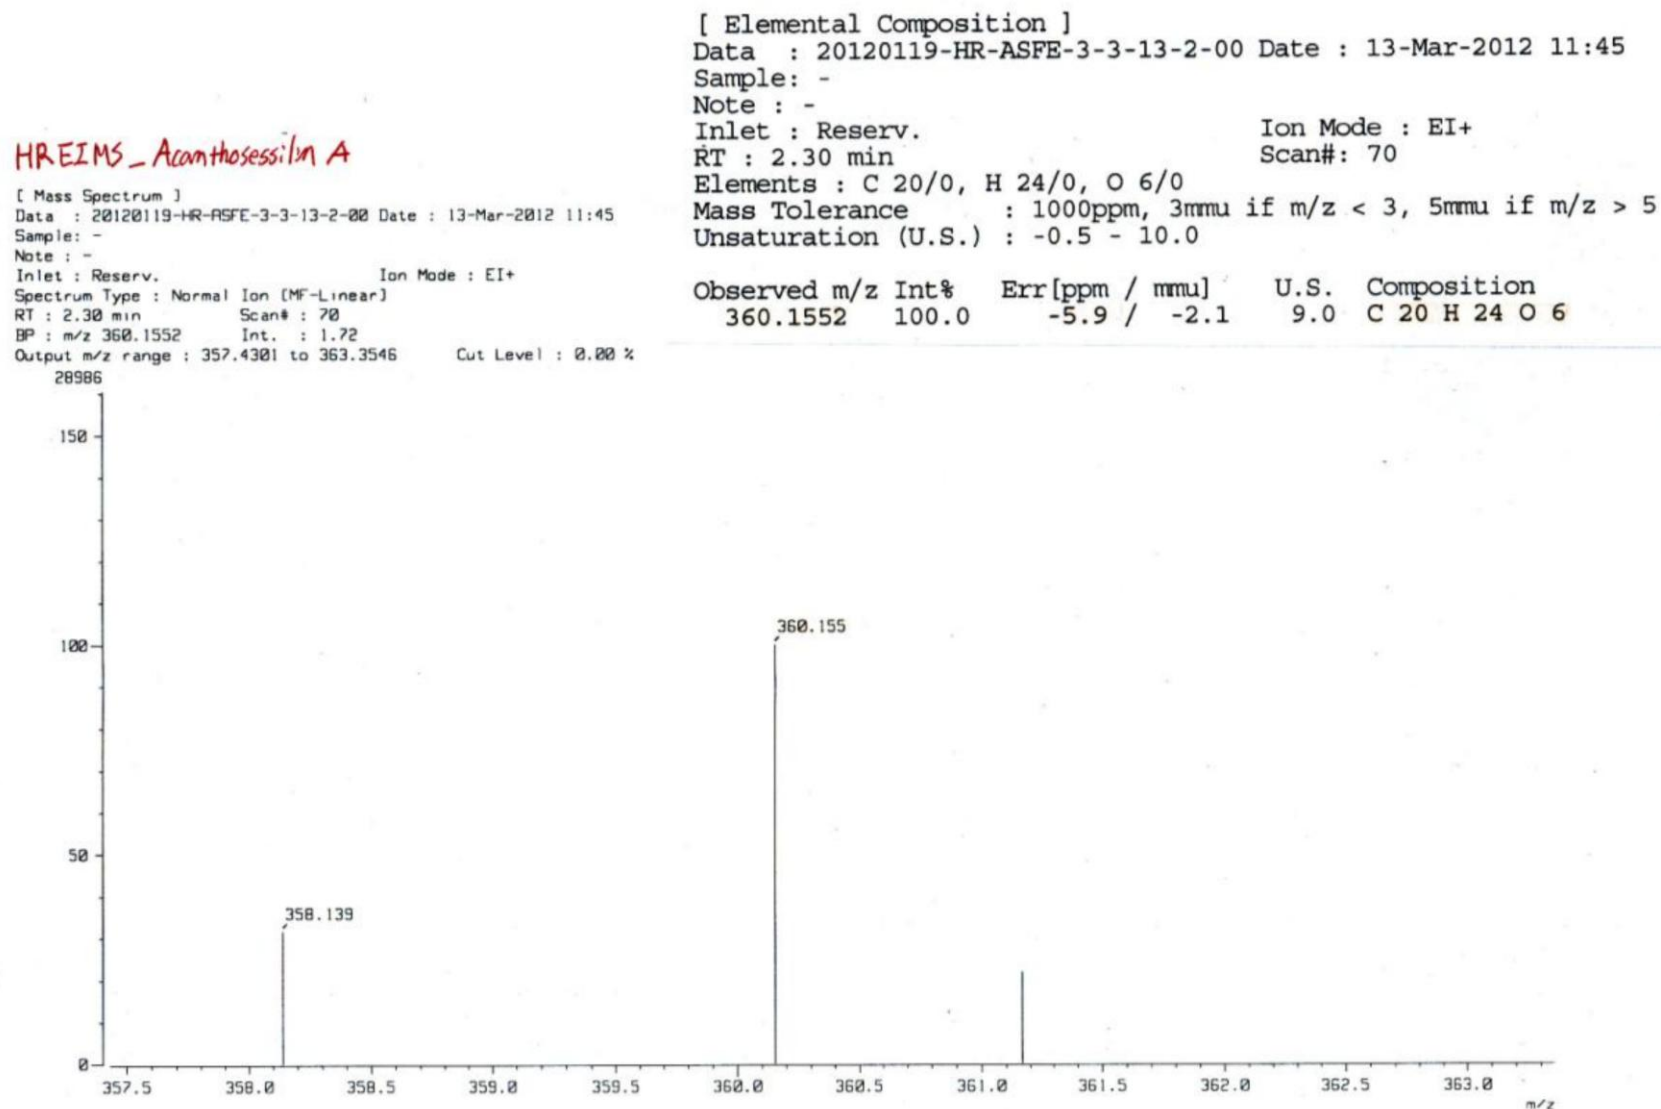

Supplement: Supplementary file 1 [file molecules-18-00041-s001.pdf]
